# Supplementary material
Source: PubMed Central journal article supplement (PMC6985718)
Supplement: AAC.01885-19-s0001.pdf [file AAC.01885-19-s0001.pdf]

1

## Supplemental Material

2 **TABLE S1** Exebacase and Antibiotic MIC values ( $\mu\text{g/mL}$ ) for all MSSA and MRSA isolates determined in CAMHB-HSD (and in the standard AST  
 3 medium for each antibiotic)<sup>a</sup>

| Designation             | EXE  | DAP           | VAN        | NAF            | OXA           | CFZ           | TLV         | AZM            | CLI          | GEN          | LNZ         | LVX              | SXT <sup>b</sup>          |
|-------------------------|------|---------------|------------|----------------|---------------|---------------|-------------|----------------|--------------|--------------|-------------|------------------|---------------------------|
| ATCC BAA-1718<br>(MSSA) | 0.5  | 0.25<br>(0.5) | 0.5<br>(1) | 0.5<br>(0.25)  | 1<br>(0.5)    | 0.5<br>(0.5)  | 2<br>(0.12) | 0.03<br>(1)    | 0.5<br>(0.5) | 1<br>(0.5)   | 2<br>(2)    | 0.25<br>(0.25)   | 0.5/9.5<br>(0.25/4.5)     |
| NRS 107<br>(MSSA)       | 0.5  | 0.25<br>(0.5) | 1<br>(2)   | 0.5<br>(0.25)  | 1<br>(0.5)    | 1<br>(0.5)    | 4<br>(0.12) | 0.02<br>(0.25) | 0.5<br>(0.5) | 0.5<br>(1)   | 1<br>(1)    | 0.25<br>(0.25)   | 1/19<br>(0.5/9.5)         |
| NRS 143<br>(MSSA)       | 0.5  | 0.25<br>(0.5) | 1<br>(1)   | 0.5<br>(0.25)  | 0.5<br>(0.5)  | 1<br>(1)      | 4<br>(0.12) | 0.06<br>(0.5)  | 2<br>(0.12)  | 1<br>(0.5)   | 2<br>(4)    | 0.25<br>(0.25)   | 0.25/4.75<br>(0.125/2.37) |
| NRS 112<br>(MSSA)       | 0.5  | 0.25<br>(0.5) | 1<br>(1)   | 0.25<br>(0.5)  | 0.5<br>(0.25) | 1<br>(0.5)    | 4<br>(0.06) | 0.06<br>(1)    | 2<br>(0.25)  | 1<br>(1)     | 2<br>(4)    | 0.25<br>(0.25)   | 0.5/9.5<br>(0.5/9.5)      |
| NRS 161<br>(MSSA)       | 0.5  | 0.25<br>(0.5) | 1<br>(1)   | 0.25<br>(0.25) | 0.5<br>(0.25) | 1<br>(0.5)    | 2<br>(0.03) | 0.06<br>(1)    | 2<br>(0.12)  | 0.5<br>(0.5) | 2<br>(2)    | 0.125<br>(0.125) | 0.25/4.75<br>(0.25/4.75)  |
| NRS 111<br>(MSSA)       | 0.5  | 0.25<br>(0.5) | 1<br>(1)   | 0.5<br>(0.25)  | 0.5<br>(0.25) | 0.5<br>(0.25) | 4<br>(0.12) | 0.06<br>(1)    | 2<br>(0.25)  | 1<br>(0.5)   | 2<br>(4)    | 0.25<br>(0.25)   | 0.5/9.5<br>(0.25/4.75)    |
| ATCC 29213<br>(MSSA)    | 0.5  | 0.25<br>(0.5) | 0.5<br>(1) | 0.5<br>(0.25)  | 0.5<br>(0.5)  | 1<br>(0.5)    | 4<br>(0.12) | 0.06<br>(1)    | 1<br>(0.25)  | 0.5<br>(0.5) | 2<br>(4)    | 0.125<br>(0.25)  | 0.5/9.5<br>(0.25/4.75)    |
| ATCC 49521<br>(MSSA)    | 0.5  | 0.5<br>(1)    | 1<br>(1)   | 0.25<br>(0.25) | 1<br>(0.5)    | 1<br>(1)      | 2<br>(0.06) | 0.03<br>(1)    | 2<br>(0.25)  | 0.5<br>(0.5) | 2<br>(4)    | 0.125<br>(0.125) | 0.5/9.5<br>(0.25/4.75)    |
| JMI 2559<br>(MSSA)      | 0.5  | 0.25<br>(0.5) | 1<br>(1)   | 0.5<br>(0.25)  | 0.5<br>(0.25) | 0.5<br>(0.5)  | 2<br>(0.12) | 0.06<br>(1)    | 2<br>(0.12)  | 1<br>(1)     | 2<br>(2)    | 0.125<br>(0.25)  | 0.5/9.5<br>(0.25/4.75)    |
| JMI 3126<br>(MSSA)      | 0.5  | 0.25<br>(0.5) | 1<br>(1)   | 0.5<br>(0.25)  | 0.5<br>(0.25) | 1<br>(0.5)    | 4<br>(0.25) | 0.06<br>(1)    | 1<br>(0.12)  | 1<br>(0.5)   | 2<br>(2)    | 0.25<br>(0.25)   | 0.5/9.5<br>(0.5/9.5)      |
| NRS 271<br>(MRSA)       | 0.25 | 0.5<br>(1)    | 1<br>(1)   | 16<br>(32)     | 64<br>(128)   | 32<br>(128)   | 2<br>(0.12) | 0.03<br>(1)    | 32<br>(2)    | 0.5<br>(1)   | 16<br>(>16) | 64<br>(>16)      | 0.25/4.75<br>(0.25/4.75)  |

|                       |      |              |          |              |              |              |             |               |                |                 |          |                 |                          |
|-----------------------|------|--------------|----------|--------------|--------------|--------------|-------------|---------------|----------------|-----------------|----------|-----------------|--------------------------|
| NRS 100<br>(MRSA)     | 0.5  | 0.5<br>(1)   | 1<br>(2) | 64<br>(128)  | 256<br>(128) | 256<br>(128) | 4<br>(0.12) | 0.06<br>(0.5) | 0.25<br>(0.03) | 0.125<br>(0.25) | 2<br>(2) | 0.5<br>(0.5)    | 2/38<br>(0.5/9.5)        |
| ATCC 43300<br>(MRSA)  | 1    | 0.5<br>(0.5) | 1<br>(1) | 4<br>(2)     | 8<br>(16)    | 16<br>(32)   | 4<br>(0.12) | 512<br>(512)  | 1024<br>(512)  | 0.5<br>(0.5)    | 1<br>(2) | 0.25<br>(0.25)  | 0.25/4.75<br>(0.125/3.7) |
| ATCC BAA-44<br>(MRSA) | 0.5  | 0.5<br>(1)   | 1<br>(1) | 4<br>(8)     | 8<br>(32)    | 16<br>(16)   | 2<br>(0.12) | 0.06<br>(1)   | 2<br>(0.25)    | 0.5<br>(0.5)    | 2<br>(2) | 0.25<br>(0.25)  | 0.5/9.5<br>(0.5/4.75)    |
| CAIRD 456<br>(MRSA)   | 0.5  | 1<br>(1)     | 1<br>(1) | 16<br>(32)   | 64<br>(128)  | 64<br>(128)  | 4<br>(0.12) | 0.03<br>(1)   | 4<br>(0.5)     | 32<br>>16       | 2<br>(2) | 0.25<br>(0.125) | 1/19<br>(0.5/4.75)       |
| JMI 227<br>(MRSA)     | 0.25 | 0.5<br>(1)   | 1<br>(1) | 4<br>(8)     | 8<br>(32)    | 2<br>(4)     | 2<br>(0.06) | 2<br>(4)      | 2<br>(0.25)    | 0.25<br>(0.5)   | 2<br>(2) | 16<br>(>16)     | 0.5/9.5<br>(0.25/4.75)   |
| JMI 1280<br>(MRSA)    | 0.5  | 1<br>(1)     | 1<br>(1) | 256<br>(256) | 256<br>(256) | 65<br>(128)  | 4<br>(0.12) | 1024<br>(512) | 1024<br>(512)  | 0.5<br>(0.5)    | 2<br>(1) | 32<br>(>16)     | 0.5/9.5<br>(0.5/9.5)     |
| JMI 4789<br>(MRSA)    | 0.5  | 1<br>(1)     | 1<br>(1) | 4<br>(6)     | 64<br>(64)   | 4<br>(8)     | 4<br>(0.12) | 0.03<br>(0.5) | 2<br>(0.25)    | 0.5<br>(0.5)    | 2<br>(2) | 0.25<br>(0.25)  | 0.5/9.5<br>(0.5/9.5)     |
| MW2<br>(MRSA)         | 0.5  | 1<br>(1)     | 1<br>(1) | 4<br>(8)     | 64<br>(64)   | 32<br>(32)   | 2<br>(0.06) | 0.06<br>(0.5) | 2<br>(0.5)     | 0.5<br>(0.5)    | 2<br>(2) | 0.25<br>(0.25)  | 0.5/9.5<br>(0.25/4.75)   |
| ATCC 33591<br>(MRSA)  | 0.5  | 1<br>(1)     | 2<br>(1) | 64<br>(128)  | 256<br>(256) | 128<br>(128) | 2<br>(0.06) | 1024<br>(512) | 1024<br>(512)  | 1<br>(2)        | 2<br>(2) | 0.25<br>(0.5)   | 2/38<br>(1/19)           |

4 <sup>a</sup>MIC values for each antibiotic determined in the standard AST media described in CLSI document M100-A29 (1), are indicated in parentheses  
5 below each antibiotic. Abbreviations for each agent (and the standard AST media for each antibiotic) are as follows: EXE, exebacase; DAP,  
6 daptomycin (CAMHB supplemented with Ca<sup>2+</sup> to a final concentration of 50 µg/mL); VAN, vancomycin (CAMHB); NAF, nafcillin (CAMHB  
7 supplemented with 2% NaCl); OXA, oxacillin (CAMHB supplemented with 2% NaCl); CFZ, cefazolin (CAMHB); TLV, telavancin (CAMHB  
8 supplemented with 0.002% polysorbate 80); AZM, azithromycin (CAMHB); CLI, clindamycin (CAMHB); GEN, gentamicin (CAMHB); LNZ, linezolid  
9 (CAMHB); LVX, levofloxacin (CAMHB); SXT, Trimethoprim-Sulfamethoxazole (CAMHB). All solvents and diluents used for the preparing antibiotic  
10 stock solutions are described in CLSI document M100-A28 (1).

11 <sup>b</sup>The MIC values for SXT are reported in the manner described in CLSI document M100-A29 (1), based on the minimal inhibitory concentrations  
12 of trimethoprim/sulfamethoxazole (when tested at a trimethoprim-to-sulfamethoxazole combination ratio of 1:19).

13

14

15

16

17

18

19

20

21

22

23

24

25

26

27

28 **TABLE S2** Strains utilized in this study

| <b>Designation</b> | <b>Type</b> | <b>Description</b>                                                                                                          | <b>Source and/or Reference</b>                                                            |
|--------------------|-------------|-----------------------------------------------------------------------------------------------------------------------------|-------------------------------------------------------------------------------------------|
| NRS 271            | MRSA        | Staphylococcal Cassette Chromosome <i>mec</i> ( <i>SCCmec</i> ) type IV, isolated from wound infection, linezolid-resistant | BEI Resources, catalog number NR-46062 (2)                                                |
| NRS 100            | MRSA        | Strain COL, <i>SCCmec</i> type I, Panton-Valentine leucocidin (PVL) toxin-negative                                          | BEI Resources, catalog number NR-45906 (3)                                                |
| ATCC 43300         | MRSA        | Reference strain, <i>SCCmec</i> type II, PVL-negative                                                                       | ATCC (4)                                                                                  |
| ATCC BAA-44        | MRSA        | Hospital isolate, <i>SCCmec</i> type 1a, PVL-negative                                                                       | ATCC (5)                                                                                  |
| CAIRD 456          | MRSA        | USA100, Hospital-acquired MRSA                                                                                              | David Nicholau, Center for Anti-Infective Research and Development, Hartford Hospital (6) |
| JMI 227            | MRSA        | Clinical blood isolate, <i>SCCmec</i> type IV, PVL-negative                                                                 | Purchased from JMI Laboratories                                                           |
| JMI 1280           | MRSA        | Clinical blood isolate, <i>SCCmec</i> type II, PVL-negative                                                                 | Purchased from JMI Laboratories                                                           |
| JMI 4789           | MRSA        | Clinical skin and soft tissue infection isolate, <i>SCCmec</i> type IV, PVL-positive                                        | Purchased from JMI Laboratories                                                           |

|               |      |                                                                                            |                                                 |
|---------------|------|--------------------------------------------------------------------------------------------|-------------------------------------------------|
| NRS123        | MRSA | Strain MW2, SCCmec type IV, PVL-positive, USA400                                           | BEI Resources, catalog number NRS123<br>(7)     |
| ATCC 33591    | MRSA | SCCmec type I, PVL negative                                                                | ATCC (8)                                        |
| ATCC BAA-1718 | MSSA | Community acquired MSSA                                                                    | ATCC (9)                                        |
| NRS 107       | MSSA | Strain RN4220/pG0400, mupirocin-resistant                                                  | BEI Resources, catalog number NR-<br>45913 (10) |
| NRS 143       | MSSA | Strain CTC8325 (RN3984), toxic shock syndrome<br>toxin-1 (TSST-1), agr group III prototype | BEI Resources, catalog number NRS143<br>(11)    |
| NRS 112       | MSSA | Strain MN8, TSST-1, USA200                                                                 | BEI Resources, catalog number NR-<br>45918 (12) |
| NRS 161       | MSSA | Isolated from skin infection, PVL-positive, skin<br>infection, agr group 1                 | BEI Resources, catalog number NR-<br>45961      |
| NRS 111       | MSSA | Food poisoning isolate, FRI913, TSST-1                                                     | BEI Resources, catalog number NR-<br>45917 (13) |
| ATCC 29213    | MSSA | ATCC quality control strain                                                                | ATCC (4)                                        |
| ATCC 49521    | MSSA | Isolated in 2011 from bacteremia patient                                                   | Purchased from JMI Laboratories                 |
| JMI 2559      | MSSA | Isolated from respiratory tract infection                                                  | Purchased from JMI Laboratories                 |

JMI 3126

MSSA

Isolated from respiratory tract infection

Purchased from JMI Laboratories

---

## References

1. CLSI. 2019. Performance Standards for Antimicrobial Susceptibility Testing, 29th Ed. Clinical and Laboratory Standards Institute, Wayne, PA.
2. Wilson P, Andrews JA, Charlesworth R, Walesby R, Singer M, Farrell DJ, Robbins M. 2003. Linezolid resistance in clinical isolates of *Staphylococcus aureus*. *J Antimicrob Chemother* 51:186-8.
3. Gill SR, Fouts DE, Archer GL, Mongodin EF, Deboy RT, Ravel J, Paulsen IT, Kolonay JF, Brinkac L, Beanan M, Dodson RJ, Daugherty SC, Madupu R, Angiuoli SV, Durkin AS, Haft DH, Vamathevan J, Khouri H, Utterback T, Lee C, Dimitrov G, Jiang L, Qin H, Weidman J, Tran K, Kang K, Hance IR, Nelson KE, Fraser CM. 2005. Insights on evolution of virulence and resistance from the complete genome analysis of an early methicillin-resistant *Staphylococcus aureus* strain and a biofilm-producing methicillin-resistant *Staphylococcus epidermidis* strain. *J Bacteriol* 187:2426-38.
4. CLSI. 2018. Methods for Dilution Antimicrobial Susceptibility Tests for Bacteria That Grow Aerobically, 11th Edition. Clinical and Laboratory Standards Institute, Wayne, PA.
5. Sanches IS, Ramirez M, Troni H, Abecassis M, Padua M, Tomasz A, de Lencastre H. 1995. Evidence for the geographic spread of a methicillin-resistant *Staphylococcus aureus* clone between Portugal and Spain. *J Clin Microbiol* 33:1243-6.
6. Keel RA, Tessier PR, Crandon JL, Nicolau DP. 2012. Comparative efficacies of human simulated exposures of tedizolid and linezolid against *Staphylococcus aureus* in the murine thigh infection model. *Antimicrob Agents Chemother* 56:4403-7.
7. Baba T, Takeuchi F, Kuroda M, Yuzawa H, Aoki K, Oguchi A, Nagai Y, Iwama N, Asano K, Naimi T, Kuroda H, Cui L, Yamamoto K, Hiramatsu K. 2002. Genome and virulence determinants of high virulence community-acquired MRSA. *Lancet* 359:1819-27.
8. Schaeffler S, Perry W, Jones D. 1979. Methicillin-resistant strains of *Staphylococcus aureus* phage type 92. *Antimicrob Agents Chemother* 15:74-80.
9. Highlander SK, Hulten KG, Qin X, Jiang H, Yerrapragada S, Mason EO, Jr., Shang Y, Williams TM, Fortunov RM, Liu Y, Igboeli O, Petrosino J, Tirumalai M, Uzman A, Fox GE, Cardenas AM, Muzny DM, Hemphill L, Ding Y, Dugan S, Blyth PR, Buhay CJ, Dinh HH, Hawes AC, Holder M, Kovar CL, Lee SL, Liu W, Nazareth LV, Wang Q, Zhou J, Kaplan SL, Weinstock GM. 2007. Subtle genetic changes enhance virulence of methicillin resistant and sensitive *Staphylococcus aureus*. *BMC Microbiol* 7:99.
10. Morton TM, Johnston JL, Patterson J, Archer GL. 1995. Characterization of a conjugative staphylococcal mupirocin resistance plasmid. *Antimicrob Agents Chemother* 39:1272-80.
11. Lindsay JA, Ruzin A, Ross HF, Kurepina N, Novick RP. 1998. The gene for toxic shock toxin is carried by a family of mobile pathogenicity islands in *Staphylococcus aureus*. *Mol Microbiol* 29:527-43.
12. Schlievert PM, Blomster DA. 1983. Production of staphylococcal pyrogenic exotoxin type C: influence of physical and chemical factors. *J Infect Dis* 147:236-42.
13. Hovde CJ, Marr JC, Hoffmann ML, Hackett SP, Chi YI, Crum KK, Stevens DL, Stauffacher CV, Bohach GA. 1994. Investigation of the role of the disulphide bond in the activity and structure of staphylococcal enterotoxin C1. *Mol Microbiol* 13:897-909.
